## Correction

# Correction: Determinants of Fatigue after First-Ever Ischemic Stroke during Acute Phase

**The PLOS ONE Staff**

The affiliation for the fourth author is incorrect. Ruoling Chen is not affiliated with #3 but with #4 Centre for Health and Social Care Improvement (CHSCI), University of Wolverhampton, Wolverhampton, United Kingdom.

**Reference**

1. Wang S-S, Wang J-J, Wang P-X, Chen R (2014) Determinants of Fatigue after First-Ever Ischemic Stroke during Acute Phase. PLoS ONE 9(10): e110037. doi:10.1371/journal.pone.0110037

---

**Citation:** The PLOS ONE Staff (2014) Correction: Determinants of Fatigue after First-Ever Ischemic Stroke during Acute Phase. PLoS ONE 9(12): e116461. doi:10.1371/journal.pone.0116461

**Published:** December 19, 2014

**Copyright:** © 2014 The PLOS ONE Staff. This is an open-access article distributed under the terms of the Creative Commons Attribution License, which permits unrestricted use, distribution, and reproduction in any medium, provided the original author and source are credited.
